# Supplementary material for: Differential Mechanism of ATP Production Occurs in Response to Succinylacetone in Colon Cancer Cells
Source: MDPI journal article supplement (doi:10.3390/molecules24193575), 2019-10-03
Supplement: s1 [file s1]

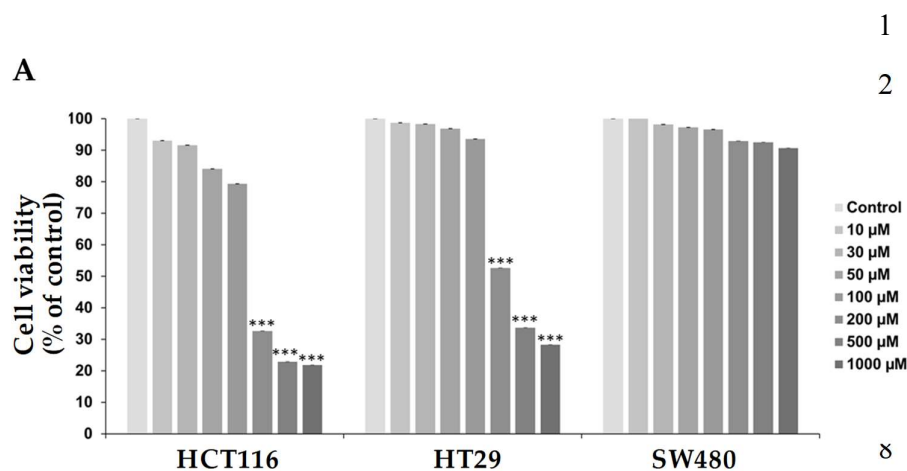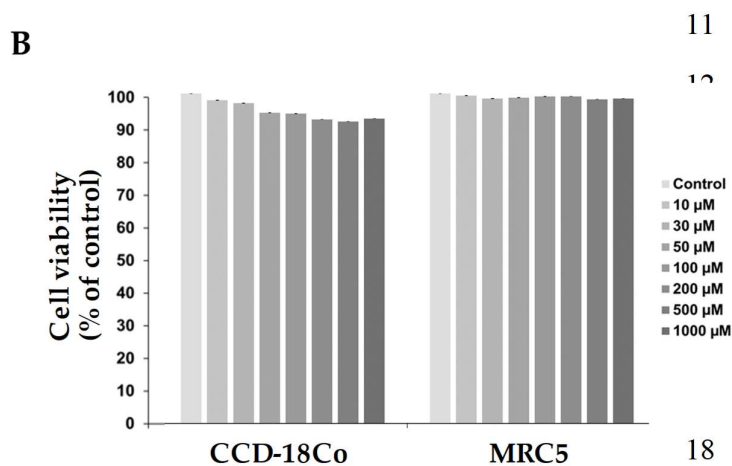

**Figure 1S.** Effect of SA to viability of colon cancer cells and normal cells. (A-B) colon cancer cells (HCT116, HT29, and SW480) were treated with various concentrations. Likewise, normal cells (CCD-180o and MRC5) was incubated with SA under same condition. MTT assay was performed to assess cell viability. Data are representative values of three independent experiments and expressed as mean  $\pm$  SD (n = 3), \*\*\*p<0.005 compared to the control group.
